# Supplementary material
Source: PubMed Central journal article supplement (PMC3296255)
Supplement: supp_111.136465_136465SI.pdf [file supp_111.136465_136465SI.pdf]

A

| Trap number | gene name | phenotype in germline            |
|-------------|-----------|----------------------------------|
| BA00253     | NetB      | wild type                        |
| CA06750     | Trxr-1    | high fraction of empty ovarioles |
| CA06924     | CAP       | wild type                        |
| CA07692     | Spt6      | loss of germline cells           |
| CA07788     | NFAT      | wild type                        |
| CB022888    | lola      | wild type                        |
| CC00380     | Pabp2     | loss of germline cells           |
| CC00737     | Tudor-SN  | wild type                        |
| CC00791     | vkg       | wild type                        |
| CC01032     | sno       | wild type                        |
| CC01377     | Cp1       | degenerating egg chambers        |
| CC01493     | Fim       | wild type                        |

B

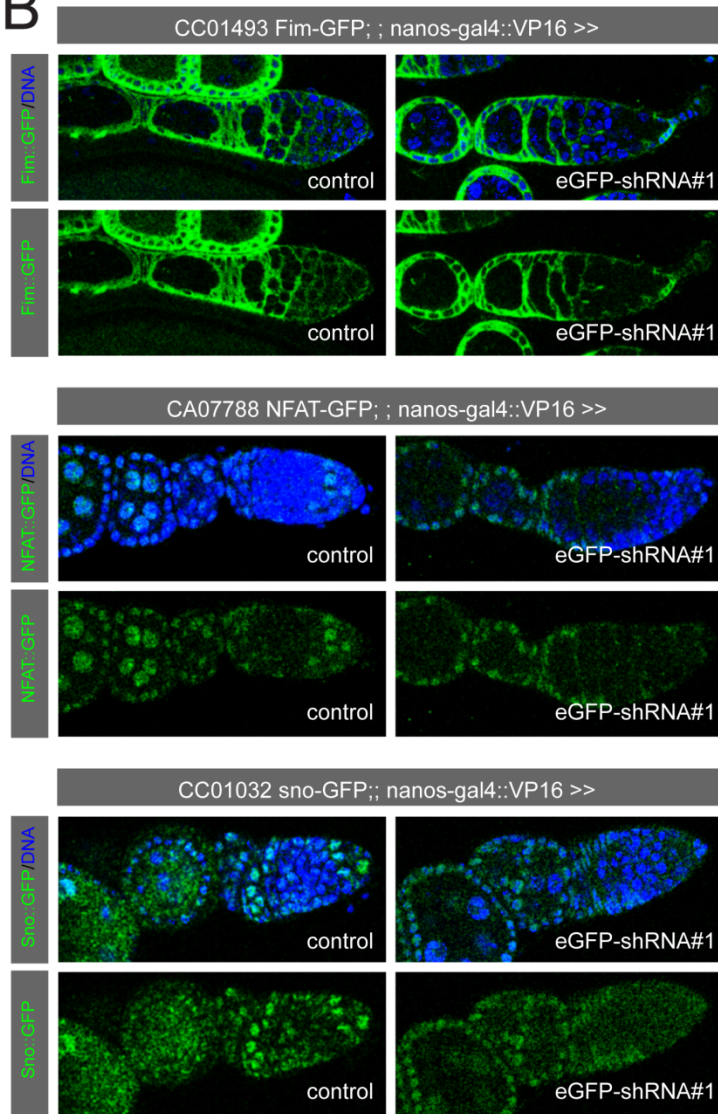

C

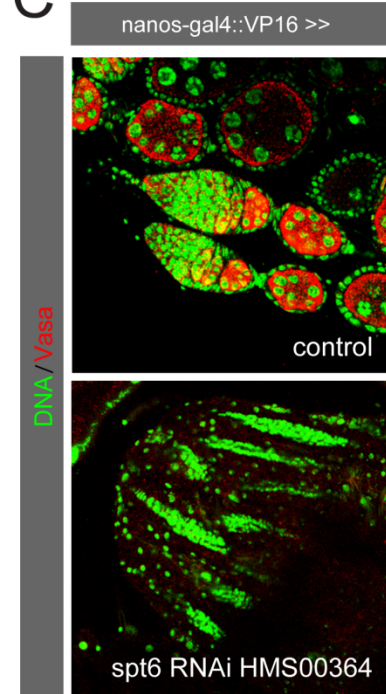

D

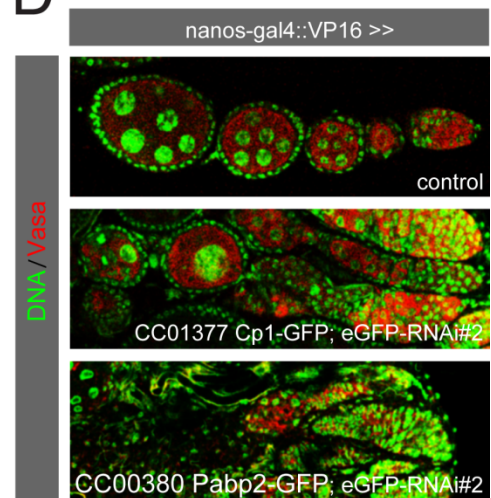

**Figure S1** (A) Homozygous viable GFP traps with expression in the germline were selected from the Carnegie collection (Buszczak et al. 2007). EGFP-shRNAs were driven in the background of these traps using the germline-specific *nanos-GAL4*. The phenotype upon tag-mediated knockdown is indicated. (B) Examples of GFP traps that showed depletion of GFP signal in the germline but failed to show any detectable phenotype upon tag-mediated knockdown. Ovarioles stained for GFP and DAPI are shown; endogenous GFP fluorescence is shown for CC01493. (C) *Spt6* was knocked down in the germline using a *Spt6*-specific shRNA construct driven by *nanos-GAL4*, and ovaries were stained for Vasa and DAPI. The gene-specific knockdown is indistinguishable from tag-mediated knockdown (Figure 1D). (D) The indicated EGFP-shRNAs were driven by *nanos-GAL4* in the background of the *Cp1-GFP* or *Pabp2-GFP* traps, and ovaries were stained for Vasa and DAPI. The phenotypes resemble those in Figure 1, G and I, respectively.

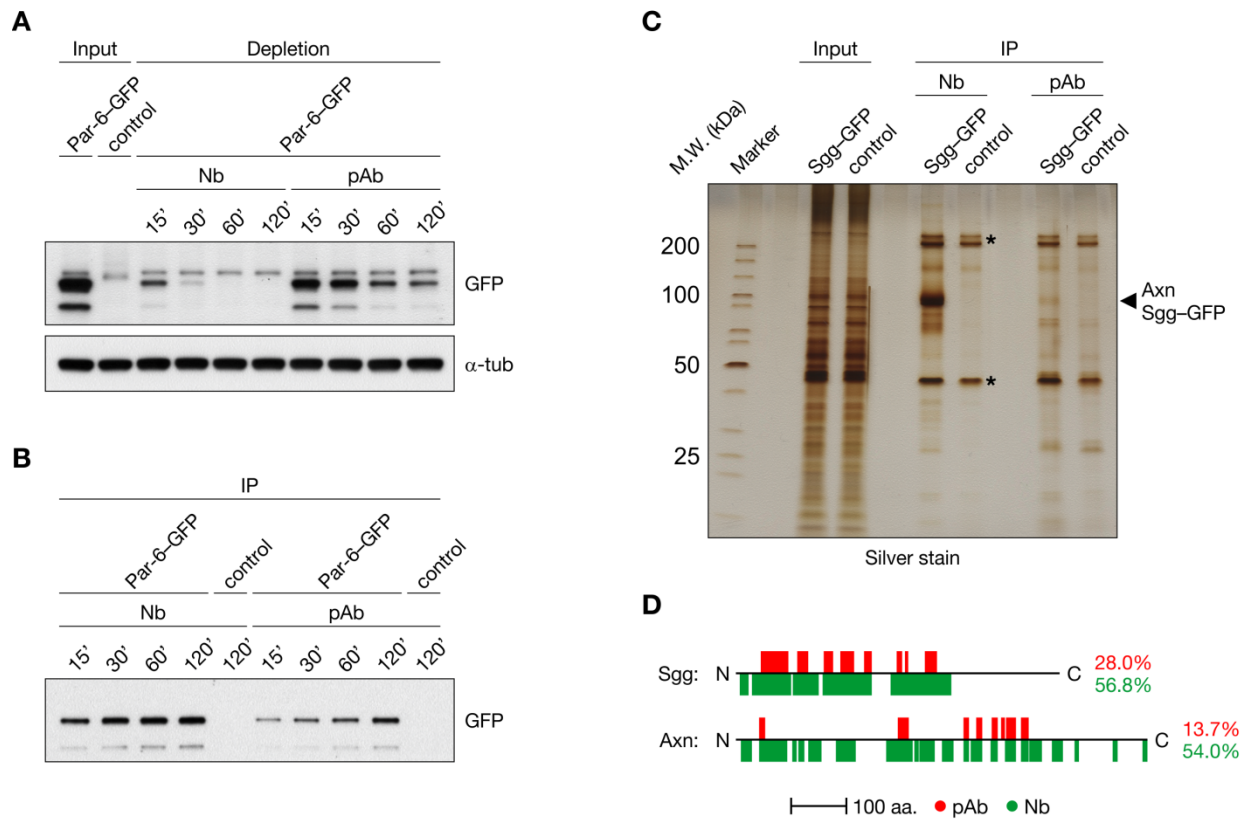

**Figure S2** (A,B) Extracts from embryos expressing Par-6-GFP were incubated with either anti-GFP nanobodies (Nb) or anti-GFP polyclonal antibodies (pAb) for 15–120 min. *w<sup>-</sup>* embryos not expressing Par-6-GFP were used as a control. (A) The depletion of Par-6-GFP from the extract was assayed by Western blot analysis. (B) Western blot analysis of the immunoprecipitates. (C,D) Embryos bearing a YFP trap in *shaggy* (*sgg*) were lysed and subjected to immunoprecipitation using either anti-GFP nanobodies (Nb) or anti-GFP polyclonal antibodies (pAb). (C) Silver stain of the immunoprecipitates. Asterisks indicate contaminants, presumably cytoskeletal components such as myosins and actin, which occasionally precipitate out or stick to the beads. (D) Peptide coverage maps of the *Sgg* bait and its binding partner Axin (Axn), obtained by LC-MS/MS after in-solution digestion of the immunoprecipitates prepared using either nanobodies (green) or polyclonal control antibodies (red). Percentages indicate the overall peptide coverages of the proteins.

## File S1

### Proteins identified by mass spectrometry

All proteins identified by LC-MS/MS in the immunoprecipitation experiments summarized in Figure 2F and Figure S2D.

Worksheet names specify the bait and antibody reagent (Nb, anti-GFP nanobodies; pAb, anti-GFP polyclonal control antibodies) used in each experiment. The following data are provided for each hit: rank, number of unique and total peptides, average peptide cross-correlation score (XC<sub>corr</sub>), and the number of unique peptides found for the protein in the  $w^-$  control.

File S1 is available for download at <http://www.genetics.org/content/suppl/2011/12/14/genetics.111.136465.DC1> as an Excel file.

**Table S1 *Drosophila* S2R+ protein trap lines and the subcellular distribution of their mCherry signal**

| Cell line | Subcellular localization of mCherry          | Inverse PCR                           | MS   |
|-----------|----------------------------------------------|---------------------------------------|------|
| NPTC1     | Control cell line with no visible signal     |                                       |      |
| NPTC2     | Control cell line with no visible signal     |                                       |      |
| NPTC3     | Control cell line with no visible signal     |                                       |      |
| NPTC4     | Control cell line with no visible signal     |                                       |      |
| NPTC5     | Control cell line with no visible signal     |                                       |      |
| NPTC6     | Control cell line with no visible signal     |                                       |      |
| NPT001    | Weak cytoplasmic signal                      |                                       |      |
| NPT002    | Weak cytoplasmic signal                      |                                       |      |
| NPT003    | Weak cytoplasmic signal                      |                                       |      |
| NPT004    | Cytoplasmic signal                           |                                       |      |
| NPT005    | Cytoplasmic signal and endoplasmic reticulum | X:13711049 ( <i>Clic</i> )            | Clic |
| NPT006    | Weak signal                                  |                                       |      |
| NPT007    | Weak signal                                  |                                       |      |
| NPT008    | Cytoplasmic signal                           |                                       |      |
| NPT009    | Weak cytoplasmic signal                      |                                       |      |
| NPT010    | Weak cytoplasmic signal                      |                                       |      |
| NPT011    | Weak signal                                  |                                       |      |
| NPT012    | Weak signal                                  |                                       |      |
| NPT014    | Cytoplasmic signal                           |                                       |      |
| NPT015    | Cytoplasmic signal                           |                                       |      |
| NPT106    | Weak cytoplasmic signal                      |                                       |      |
| NPT017    | Cytoplasmic signal and cleavage furrow       | N/A (potentially multiple insertions) | Fim  |
| NPT018    | Cytoplasmic signal                           |                                       |      |
| NPT019    | Weak signal                                  |                                       |      |
| NPT020    | Weak cytoplasmic signal                      |                                       |      |
| NPT021    | Weak signal                                  |                                       |      |
| NPT022    | Weak cytoplasmic signal                      | 3R:11236593 ( <i>atx2</i> )           |      |
| NPT023    | Weak cytoplasmic signal                      |                                       |      |
| NPT024    | Weak signal                                  |                                       |      |
| NPT025    | Weak cytoplasmic signal                      |                                       |      |
| NPT026    | Weak cytoplasmic signal                      |                                       |      |
| NPT027    | Weak signal                                  |                                       |      |
| NPT208    | Weak signal                                  |                                       |      |
| NPT029    | Weak signal                                  |                                       |      |
| NPT030    | Weak signal                                  |                                       |      |
| NPT031    | Weak signal                                  |                                       |      |
| NPT032    | Weak signal                                  |                                       |      |
| NPT033    | Weak signal                                  |                                       |      |
| NPT034    | Weak cytoplasmic signal                      |                                       |      |
| NPT035    | Weak cytoplasmic signal                      |                                       |      |
| NPT036    | Weak signal                                  |                                       |      |
| NPT037    | Weak cytoplasmic signal                      |                                       |      |
| NPT038    | Weak signal                                  |                                       |      |
| NPT039    | Weak signal                                  |                                       |      |
| NPT040    | Weak signal                                  |                                       |      |
| NPT041    | Weak signal                                  |                                       |      |

|               |                         |                            |
|---------------|-------------------------|----------------------------|
| <b>NPT042</b> | Weak signal             |                            |
| <b>NPT043</b> | Weak signal             |                            |
| <b>NPT044</b> | Weak signal             |                            |
| <b>NPT046</b> | Weak cytoplasmic signal |                            |
| <b>NPT047</b> | Weak signal             |                            |
| <b>NPT048</b> | Weak signal             |                            |
| <b>NPT049</b> | Weak signal             |                            |
| <b>NPT050</b> | Peri-Golgi              |                            |
| <b>NPT052</b> | Weak signal             |                            |
| <b>NPT101</b> | Endoplasmic Reticulum   |                            |
| <b>NPT102</b> | Endoplasmic Reticulum   | 3L:9844863 ( <i>gap1</i> ) |
| <b>NPT103</b> | Cytoplasmic signal      |                            |
| <b>NPT104</b> | Cytoplasmic signal      |                            |

---

The insertion site as mapped by inverse PCR and the trapped protein as identified by LC-MS/MS (MS) are indicated, if determined.

**Table S2 Oligos used to generate EGFP-shRNAs. Capitalized letters indicate target-specific sequences**

| <b>Construct</b> | <b>Forward oligo</b>                                                        | <b>Reverse oligo</b>                                                      |
|------------------|-----------------------------------------------------------------------------|---------------------------------------------------------------------------|
| <b>#1</b>        | ctagcagtCGGCATCAAGGTGAACCTCAAtagttatattcaagcata<br>TTGAAGTTCACCTTGATGCCGgcg | aattcgcCGGCATCAAGGTGAACCTCAAtatgcttgaataactaT<br>TGAAGTTCACCTTGATGCCGactg |
| <b>#2</b>        | ctagcagtCAAGGACGACGGCAACTACAAtagttatattcaagcat<br>aTTGTAGTTGCCGTCGTCCTTGgcg | aattcgcCAAGGACGACGGCAACTACAAtatgcttgaataacta<br>TTGTAGTTGCCGTCGTCCTTGactg |
| <b>#3</b>        | ctagcagtCGGCCACAAGTTCAGCGTGTctagttatattcaagcata<br>GACACGCTGAACTTGTGGCCGgcg | aattcgcCGGCCACAAGTTCAGCGTGTctatgcttgaataacta<br>GACACGCTGAACTTGTGGCCGactg |
