# Supplementary material
Source: PubMed Central journal article supplement (PMC3296255)
Supplement: supp_111.136465_FigureS1.pdf [file supp_111.136465_FigureS1.pdf]

A

| Trap number | gene name | phenotype in germline            |
|-------------|-----------|----------------------------------|
| BA00253     | NetB      | wild type                        |
| CA06750     | Trxr-1    | high fraction of empty ovarioles |
| CA06924     | CAP       | wild type                        |
| CA07692     | Spt6      | loss of germline cells           |
| CA07788     | NFAT      | wild type                        |
| CB022888    | lola      | wild type                        |
| CC00380     | Pabp2     | loss of germline cells           |
| CC00737     | Tudor-SN  | wild type                        |
| CC00791     | vkg       | wild type                        |
| CC01032     | sno       | wild type                        |
| CC01377     | Cp1       | degenerating egg chambers        |
| CC01493     | Fim       | wild type                        |

B

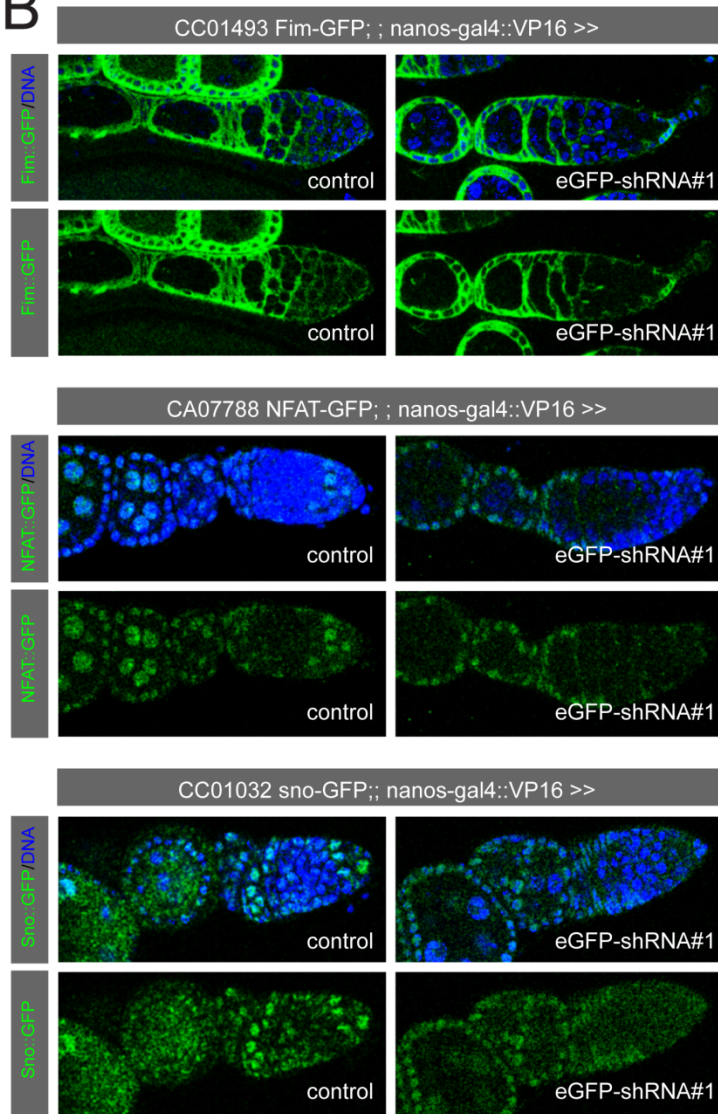

C

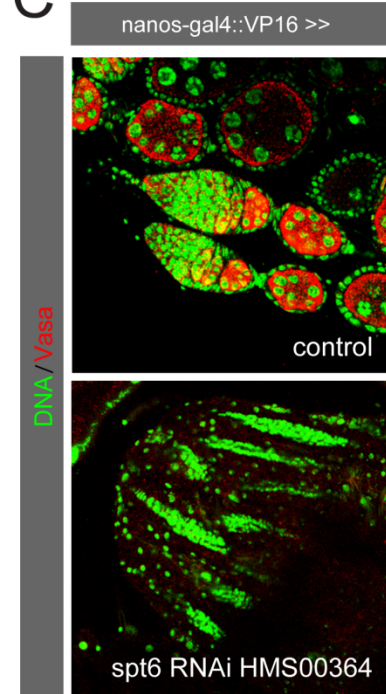

D

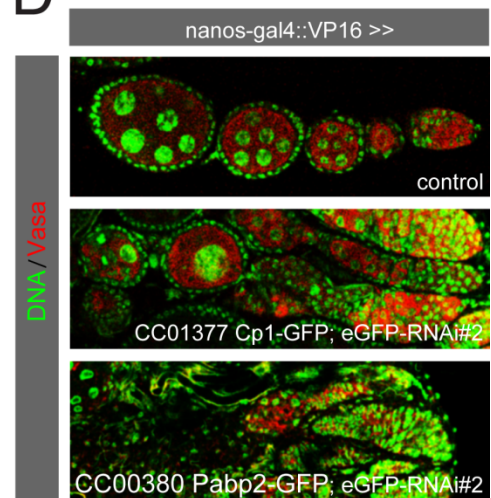

**Figure S1** (A) Homozygous viable GFP traps with expression in the germline were selected from the Carnegie collection (Buszczak et al. 2007). EGFP-shRNAs were driven in the background of these traps using the germline-specific *nanos-GAL4*. The phenotype upon tag-mediated knockdown is indicated. (B) Examples of GFP traps that showed depletion of GFP signal in the germline but failed to show any detectable phenotype upon tag-mediated knockdown. Ovarioles stained for GFP and DAPI are shown; endogenous GFP fluorescence is shown for CC01493. (C) *Spt6* was knocked down in the germline using a *Spt6*-specific shRNA construct driven by *nanos-GAL4*, and ovaries were stained for Vasa and DAPI. The gene-specific knockdown is indistinguishable from tag-mediated knockdown (Figure 1D). (D) The indicated EGFP-shRNAs were driven by *nanos-GAL4* in the background of the *Cp1-GFP* or *Pabp2-GFP* traps, and ovaries were stained for Vasa and DAPI. The phenotypes resemble those in Figure 1, G and I, respectively.
