# Supplementary material
Source: PubMed Central journal article supplement (PMC3296255)
Supplement: supp_111.136465_TableS2.pdf [file supp_111.136465_TableS2.pdf]

**Table S2 Oligos used to generate EGFP-shRNAs. Capitalized letters indicate target-specific sequences**

| <b>Construct</b> | <b>Forward oligo</b>                                                        | <b>Reverse oligo</b>                                                      |
|------------------|-----------------------------------------------------------------------------|---------------------------------------------------------------------------|
| <b>#1</b>        | ctagcagtCGGCATCAAGGTGAACCTCAAtagttatattcaagcata<br>TTGAAGTTCACCTTGATGCCGgcg | aattcgcCGGCATCAAGGTGAACCTCAAtatgcttgaataactaT<br>TGAAGTTCACCTTGATGCCGactg |
| <b>#2</b>        | ctagcagtCAAGGACGACGGCAACTACAAtagttatattcaagcat<br>aTTGTAGTTGCCGTCGTCCTTGgcg | aattcgcCAAGGACGACGGCAACTACAAtatgcttgaataacta<br>TTGTAGTTGCCGTCGTCCTTGactg |
| <b>#3</b>        | ctagcagtCGGCCACAAGTTCAGCGTGTctagttatattcaagcata<br>GACACGCTGAACTTGTGGCCGgcg | aattcgcCGGCCACAAGTTCAGCGTGTctatgcttgaataacta<br>GACACGCTGAACTTGTGGCCGactg |
